# Supplementary material for: Incipient Diabetes Treated with Long-Term Classical Prescription
Source: J Diabetes Res. 2019 Nov 5;2019:3054213. doi: 10.1155/2019/3054213 (PMC6875013; doi:10.1155/2019/3054213)
Supplement: Supplementary Materials — Changes in islet function and blood glucose during treatment. [file 3054213.f1.xls]

## Sheet: Supplementary Table 1
Supplementary Table 1: Changes in islet function during treatment of 10 years
Date	INS 0h (pmol/L)	INS 0.5h (pmol/L)	INS 2h (pmol/L)	C-PEP 0h (nmol/L)	C-PEP 0.5h (nmol/L)	C-PEP 2h (nmol/L)	GLU 0h (mmol/L)	GLU 0.5h (mmol/L)	GLU 2h (mmol/L)
2007/11/07	104.7	163.6	272.8	0.71	0.8	1.13	8.37	9.78	14.74
2008/01/17	27.4	205	199.7	0.31	0.33	0.87	6.05	8.55	5.68
2008/04/17	31.9	140.4	361.8	0.35	0.65	1.88	6.04	7.87	6.91
2009/05/04	26.92	186.15	322.2	0.23	0.67	1.66	5.24	8.04	8.14
2010/12/13	49.45	80.86	38.9	0.11	0.07	0.09	6.68	11.51	8.29
2013/06/03	37.9	250.76	272.2	0.47	1.08	1.71	6.25	11.1	6.75
2016/06/07	39.17	507.36	339.81	0.35	1.39	2.22	6.8	12.7	9.3
2017/07/11	111.37	289.27	306.27	0.68	1.18	1.81	6.7	10.2	10.4
INS: insulin; C-PEP: C-peptide; GLU: glucose

## Sheet: Supplementary Table 2
Supplementary Table 2: Changes in blood glucose during treatment of 10 years
Time(month)	HbA1C		Time(month)	FPG	2hPG		Time(month)	Fasting insulin		Time(month)	C-peptide
0	14.2		0	14.7	13.3		0	104.7		0	0.71
1	11		1	7.4	9.6		2	27.4		2	0.31
2	7.1		2	6.4	7.5		5	31.9		5	0.35
4	4.9		3	5.3	7.7		8	22.6		8	0.3
5	5.9		4	5.8	6.3		17	26.92		17	0.23
8	6.2		5	5.8	6.3		37	49.45		37	0.11
14	5.3		8	5.7	7.8		67	37.9		67	0.47
24	5.6		11	5.3	7.4		103	39.17		103	0.35
37	6.6		14	5.3	8.2		116	111.37		116	0.68
45	5.7		18	5.5	7.3
51	5.6		24	5.1	6.4
59	5.9		29	5.6	7.1
67	6.2		34	5.4	7.4
75	6.2		37	5.6	8.3
86	6.5		40	6.1	7.9
103	6.2		45	6.1	7.2
116	6.9		51	6.6	8.6
			59	5.7	7.5
			67	6.2	6.7
			75	6.5	7.5
			86	6.6	7.5
			103	6.8	9.3
			116	6.7	10.4
HbA1c: glycated hemoglobin; FPG: fasting plasma glucose; 2hPG: 2-h plasma glucose
